# Supplementary material for: A sum rule for inelastic electron tunneling spectroscopy: an ab initio study of a donor (TTF) and acceptors (TCNE, TCNQ and DCNQI) parallelly oriented on Cu(100)
Source: Royal Society of Chemistry journal article supplement (doi:10.1039/c3cp53049c), 2013-01-01
Supplement: c3cp53049c.pdf [file c3cp53049c.pdf]

## SUPPORTING INFORMATION

### Sum rule for inelastic electron tunneling spectroscopy : an ab initio study of donors (TTF) and acceptors (TCNE, TCNQ and DCNQI) parallel-oriented on Cu(100)

Shiri R. Burema, Marie-Laure Bocquet\*.

Ecole Normale Supérieure de Lyon, Laboratoire de Chimie, CNRS UMR 5182, 46 Allée d'Italie, 69364 CEDEX07 Lyon, France.

\*E-mail: [mbocquet@ens-lyon.fr](mailto:mbocquet@ens-lyon.fr)

Height tables are provided : the first four tables are the detailed vibrational analysis and the last four tables are IETS intensities for all modes above 50 meV.

**Table 1. Vibrational analysis of TTF/Cu(100) as calculated by the DFT approach used in this study for vibrational modes above 50 meV. The symmetry of the modes is indicated using D2h point group notation for a gas phase molecule. The two thiophene outerends of TTF are arbitrarily numbered '1' and '2' in order to denote the exact location of the described vibration in the molecule. Atoms or groups indicated between []-brackets do not participate in the actual vibrational motion, but serve to clarify the vibrating bond to which is referred.**

| v (meV) | Mode                                                                                                                         | Symmetry gas phase |
|---------|------------------------------------------------------------------------------------------------------------------------------|--------------------|
| 380     | 2 C-H stretch thiophene 1                                                                                                    | B2u                |
| 380     | 2 C-H stretch thiophene 2                                                                                                    | B2u                |
| 378     | 2 C-H stretch thiophene 1                                                                                                    | B1g                |
| 378     | 2 C-H stretch thiophene 2                                                                                                    | B1g                |
| 173     | [thiophene 1]C=C[thiophene 2] stretch                                                                                        | Ag                 |
| 147     | C=C in plane torsion thiophene 1                                                                                             | B1g                |
| 146     | C=C in plane torsion thiophene 2                                                                                             | B1g                |
| 146     | C=C stretch thiophene 1 + C=C stretch thiophene 2                                                                            | Ag                 |
| 145     | C=C stretch thiophene 1 + C=C stretch thiophene 2                                                                            | B2u                |
| 129     | C=C stretch thiophene 1                                                                                                      | B2u                |
| 129     | C=C stretch thiophene 2                                                                                                      | B2u                |
| 111     | C=C out of plane torsion thiophene 1 + C=C out of plane torsion thiophene 2 + [thiophene 1]C=C[thiophene 2] in plane torsion | Au                 |
| 109     | C=C out of plane torsion thiophene 1 + C=C out of plane torsion thiophene 2 + [thiophene 1]C=C[thiophene 2] in plane torsion | Au                 |

|     |                                                                                                                              |     |
|-----|------------------------------------------------------------------------------------------------------------------------------|-----|
| 109 | C=C out of plane torsion thiophene 1 + C=C out of plane torsion thiophene 2 + [thiophene 1]C=C[thiophene 2] in plane torsion | Au  |
| 91  | Ring stretch thiophene 1 + ring stretch thiophene 2                                                                          | B3u |
| 91  | Ring stretch thiophene 1 + ring stretch thiophene 2                                                                          | Ag  |
| 90  | Ring stretch thiophene 1 + ring stretch thiophene 2                                                                          | B2u |
| 87  | Ring stretch thiophene 1 + ring stretch thiophene 2                                                                          | B2u |
| 83  | Ring stretch (Kékulé) thiophene 1 + ring stretch (Kékulé) thiophene 2                                                        | B3u |
| 82  | Ring stretch (Kékulé) thiophene 1 + ring stretch (Kékulé) thiophene 2                                                        | B1g |
| 72  | Ring breathing thiophene 1 + ring breathing thiophene 2                                                                      | Ag  |
| 71  | Ring breathing thiophene 1 + ring breathing thiophene 2                                                                      | B2u |
| 67  | In plane bent thiophene 1 + in plane bent thiophene 2                                                                        | B3u |
| 66  | In plane bent thiophene 1 + in plane bent thiophene 2 + [thiophene 1]C=C[thiophene 2] in plane torsion                       | B1g |
| 59  | [thiophene 1]C=C[thiophene 2] out of plane torsion                                                                           | B3g |
| 58  | In plane bent thiophene 1 + in plane bent thiophene 2                                                                        | Ag  |
| 52  | In plane bent thiophene 1 + in plane bent thiophene 2                                                                        | B2u |

**Table 2. Vibrational analysis of TCNE/Cu(100) as calculated by the DFT approach used in this study for vibrational modes above 50 meV. The symmetry of the modes is indicated using D<sub>2h</sub> point group notation for a gas phase molecule.**

| <b>v (meV)</b> | <b>Mode</b>                                                          | <b>Symmetry gas phase</b> |
|----------------|----------------------------------------------------------------------|---------------------------|
| 261            | 4 CN stretch                                                         | Ag                        |
| 261            | 4 CN stretch                                                         | B2u                       |
| 253            | 4 CN stretch                                                         | B3u                       |
| 250            | 4 CN stretch                                                         | B1g                       |
| 163            | 2 C-(CN) <sub>2</sub> stretch (asymmetric)                           | B1g                       |
| 154            | 2 C-(CN) <sub>2</sub> stretch (asymmetric)                           | B3u                       |
| 145            | 2 C-(CN) <sub>2</sub> in-plane-bent (scissoring)                     | Ag                        |
| 121            | 2 C-(CN) <sub>2</sub> in-plane-bent (scissoring)                     | B2u                       |
| 76             | 2 C-(CN) <sub>2</sub> in-plane-bent (scissoring)                     | Ag                        |
| 72             | 2 C-(CN) <sub>2</sub> in-plane-bent (scissoring)                     | B2u                       |
| 68             | 4 C-CN in-plane bent (rocking) + C=C stretch                         | Ag                        |
| 68             | 4 C-CN in-plane bent (rocking) + C=C in plane bent (torsion)         | B1g                       |
| 63             | 4 C-CN out-of-plane bent (wagging) + C=C out-of-plane bent (torsion) | B3g                       |
| 59             | 4 C-CN in-plane bent (scissoring)                                    | B3u                       |
| 57             | 4 C-CN out-of-plane bent (wagging)                                   | B1u                       |

**Table 3. Vibrational analysis of TCNQ/Cu(100) as calculated by the DFT approach used in this study for vibrational modes above 50 meV. The symmetry of the modes is indicated using D<sub>2h</sub> point group notation for a gas phase molecule.**

| <b>v (meV)</b> | <b>Mode</b>                                                             | <b>Symmetry gas phase</b> |
|----------------|-------------------------------------------------------------------------|---------------------------|
| 388            | 4 C-H stretch Ph                                                        | Ag                        |
| 387            | 4 C-H stretch Ph                                                        | B3u                       |
| 385            | 4 C-H stretch Ph                                                        | B1g                       |
| 385            | 4 C-H stretch Ph                                                        | B2u                       |
| 265            | 4 C-N stretch                                                           | Ag                        |
| 264            | 4 C-N stretch                                                           | B2u                       |
| 255            | 4 C-N stretch                                                           | B1g                       |
| 255            | 4 C-N stretch                                                           | B3u                       |
| 197            | C-C stretch Ph                                                          | Ag                        |
| 190            | C-C stretch Ph                                                          | B1g                       |
| 184            | C-C stretch Ph                                                          | B2u                       |
| 176            | C-C stretch Ph                                                          | B3u                       |
| 166            | C-C ring stretch (Kékulé) Ph                                            | B3u                       |
| 162            | C-C ring twist Ph                                                       | B1g                       |
| 159            | C-C ring breathing Ph                                                   | Ag                        |
| 158            | C-C in plane bent Ph                                                    | B2u                       |
| 153            | 1 C-(CN) <sub>2</sub> stretch (asymmetric)                              | B1g                       |
| 153            | 1 C-(CN) <sub>2</sub> stretch (asymmetric)                              | B3u                       |
| 147            | C-C in plane bent Ph                                                    | Ag                        |
| 138            | C-C in plane bent Ph                                                    | B3u                       |
| 128            | 2 C-(CN) <sub>2</sub> in plane bent (scissoring) + C-C in plane bent Ph | B2u                       |
| 124            | 2 C-(CN) <sub>2</sub> in plane bent (scissoring) + C-C in plane bent Ph | Ag                        |
| 122            | 2 C-(CN) <sub>2</sub> in plane bent (scissoring) + C-C in plane bent Ph | B2u                       |
| 116            | C-C out-of-plane bent Ph                                                | Au                        |
| 115            | C-C out-of-plane bent Ph                                                | B3g                       |
| 100            | C-C out-of-plane bent Ph                                                | B1u                       |

|    |                                                                          |     |
|----|--------------------------------------------------------------------------|-----|
| 99 | C-C out-of-plane bent Ph                                                 | B2g |
| 92 | 2 C-(CN) <sub>2</sub> stretch (symmetric) + C-C in plane bent Ph         | Ag  |
| 88 | C-C out-of-plane bent Ph                                                 | B3g |
| 80 | 4 C-CN in plane bent (scissoring) + Ph frustrated translation (in plane) | B2u |
| 78 | C-C in plane bent Ph                                                     | B1g |
| 77 | 4 C-CN in plane bent (scissoring) + C-C in plane bent Ph                 | Ag  |
| 69 | 4 C-CN out-of-plane bent (wagging)+ C-C out-of-plane bent Ph             | B1u |

**Table 4. Vibrational analysis of DCNQI/Cu(100) as calculated by the DFT approach used in this study for vibrational modes above 50 meV. The symmetry of the modes is indicated using D2h point group notation for a gas phase molecule. This is an approximation to the actual C2h symmetry of this compound in order to facilitate comparison with the other fragments. For completeness, C2h notation is used in brackets.**

| v (meV) | Mode                                                             | Symmetry gas phase |
|---------|------------------------------------------------------------------|--------------------|
| 387     | 3 C-H stretch                                                    | B1g (Ag)           |
| 387     | 3 C-H stretch                                                    | B1g (Ag)           |
| 384     | 3 C-H stretch                                                    | B1g (Ag)           |
| 384     | 3 C-H stretch                                                    | B1g (Ag)           |
| 257     | 2 N-C-N stretch (asymmetric)                                     | B2u (Bu)           |
| 254     | 2 N-C-N stretch (asymmetric)                                     | Ag (Ag)            |
| 191     | C-C stretch Ph                                                   | Ag (Ag)            |
| 186     | C-C stretch Ph                                                   | B1g (Ag)           |
| 180     | 2 N-Ph stretches + C-C stretch Ph                                | B2u (Bu)           |
| 171     | 2 N-Ph in-plane bent (torsion)+ C-C stretch Ph                   | B3u (Bu)           |
| 164     | 2 N-C-N stretch (symmetric) + C-C stretch Ph                     | Ag (Ag)            |
| 163     | C-C stretch (Kékulé) Ph                                          | B3u (Bu)           |
| 161     | 2 N-C-N stretch (symmetric) + C-C stretch Ph                     | B2u (Bu)           |
| 157     | C-C ring twist Ph                                                | B1g (Ag)           |
| 142     | C-C ring breathing Ph                                            | Ag (Ag)            |
| 137     | 2 N-C-N stretch (symmetric) + C-C in-plane bent Ph               | B2u (Bu)           |
| 134     | 2 N-C-N stretch (symmetric) + C-C in-plane bent Ph               | B3u (Bu)           |
| 134     | 2 N-C-N stretch (symmetric) + C-C in-plane bent Ph               | B3u (Bu)           |
| 122     | C-C in plane bent Ph                                             | B2u (Bu)           |
| 109     | C-C out of plane bent Ph                                         | Au (Au)            |
| 109     | C-C out of plane bent Ph                                         | B3g (Bg)           |
| 100     | 2 N-C-N in plane bent (scissoring)+ C-C in plane bent Ph         | Ag (Ag)            |
| 98      | 2 N-Ph out-of-plane torsion + C-C out of plane bent Ph           | B1u (Au)           |
| 97      | C-C out of plane bent Ph                                         | B2g (Bg)           |
| 92      | 2 N-C-N in plane bent (scissoring) + C-C in plane bent Ph        | B2u (Bu)           |
| 83      | 2 C-N-Ph out-of-plane bent (twisting) + C-C out of plane bent Ph | B3g (Bg)           |
| 79      | 2 N-C-N in plane bent (scissoring) + C-C in plane bent Ph        | B1g (Ag)           |

|    |                                                                           |          |
|----|---------------------------------------------------------------------------|----------|
| 76 | 2 C-N-Ph in plane bent (scissoring) + C-C in plane bent Ph                | B1g (Ag) |
| 69 | 2 N-C-N in plane bent (scissoring) + Ph frustrated translation (in plane) | B2u (Bu) |
| 64 | 2 C-N-Ph out-of-plane bent (wagging) + C-C out of plane bent Ph           | B1u (Au) |
| 60 | 2 N-C-N out-of-plane bent (wagging)                                       | B1u (Au) |
| 59 | 2 N-C-N out-of-plane bent (wagging)                                       | B3g (Bg) |

**Table 5. IETS relative intensities  $\eta$  in % per vibration mode in meV of TTF/Cu(100) as calculated by the IETS approach used in this study for vibrational modes above 50 meV. Two positions above the molecule have been quoted : on center and off center (above the functional groups) ones.**

| $\nu$ (meV) | $\eta$ on center (%) | $\eta$ off center (%) |
|-------------|----------------------|-----------------------|
| 380         | 0.1                  | 5.7                   |
| 380         | 0.0                  | 3.6                   |
| 378         | 0.0                  | 10.1                  |
| 378         | 0.0                  | 8.7                   |
| 173         | 1.5                  | 0.5                   |
| 147         | 0.1                  | 1.3                   |
| 146         | 0.1                  | 0.2                   |
| 146         | 0.1                  | 0.5                   |
| 145         | 0.1                  | 0.3                   |
| 129         | 0.5                  | 1.1                   |
| 129         | 0.1                  | 0.1                   |
| 111         | 0.9                  | 0.6                   |
| 109         | 0.3                  | 1.4                   |
| 109         | 0.4                  | 1.5                   |
| 91          | 0.3                  | 0.1                   |
| 91          | 0.0                  | 0.0                   |
| 90          | 0.2                  | 1.3                   |
| 87          | 0.6                  | 1.2                   |
| 83          | 0.1                  | 2.1                   |
| 82          | 0.0                  | 0.3                   |
| 72          | 0.0                  | 0.0                   |
| 71          | 1.0                  | 1.2                   |
| 67          | 0.1                  | 0.2                   |

|    |     |     |
|----|-----|-----|
| 66 | 0.2 | 0.2 |
| 59 | 1.2 | 2.3 |
| 58 | 0.2 | 0.9 |
| 52 | 0.3 | 1.6 |



**Table 6. IETS relative intensities  $\eta$  in % per vibration mode in meV of TCNE/Cu(100) as calculated by the IETS approach used in this study for vibrational modes above 50 meV. Two positions above the molecule have been quoted : on center and off center (above the functional groups) ones.**

| <b><math>\nu</math> (meV)</b> | <b><math>\eta</math> on center (%)</b> | <b><math>\eta</math> off center (%)</b> |
|-------------------------------|----------------------------------------|-----------------------------------------|
| 261                           | 0.0                                    | 0.1                                     |
| 261                           | 2.4                                    | 0.9                                     |
| 253                           | 0.1                                    | 0.2                                     |
| 250                           | 0.1                                    | 0.0                                     |
| 163                           | 0.1                                    | 0.4                                     |
| 154                           | 0.1                                    | 0.1                                     |
| 145                           | 0.1                                    | 0.2                                     |
| 121                           | 2.0                                    | 1.3                                     |
| 76                            | 0.0                                    | 0.1                                     |
| 72                            | 0.8                                    | 0.6                                     |
| 68                            | 0.3                                    | 0.6                                     |
| 68                            | 0.2                                    | 0.4                                     |
| 63                            | 2.0                                    | 1.0                                     |
| 59                            | 0.3                                    | 0.2                                     |
| 57                            | 0.4                                    | 0.3                                     |

**Table 7. IETS relative intensities  $\eta$  in % per vibration mode in meV of TCNQ/Cu(100) as calculated by the IETS approach used in this study for vibrational modes above 50 meV. Two positions above the molecule have been quoted : on center and off center (above the functional groups) ones.**

| <b><math>\nu</math> (meV)</b> | <b><math>\eta</math> on center (%)</b> | <b><math>\eta</math> off center (%)</b> |
|-------------------------------|----------------------------------------|-----------------------------------------|
| 388                           | 0.1                                    | 0.1                                     |
| 387                           | 0.1                                    | 0.0                                     |
| 385                           | 0.0                                    | 0.0                                     |
| 385                           | 0.0                                    | 0.0                                     |
| 265                           | 0.0                                    | 0.0                                     |
| 264                           | 4.0                                    | 0.6                                     |
| 255                           | 0.1                                    | 1.0                                     |
| 255                           | 0.0                                    | 0.0                                     |
| 197                           | 0.1                                    | 4.7                                     |
| 190                           | 1.4                                    | 0.1                                     |
| 184                           | 0.1                                    | 0.1                                     |
| 176                           | 0.2                                    | 0.0                                     |
| 166                           | 0.0                                    | 0.1                                     |
| 162                           | 0.1                                    | 0.0                                     |
| 159                           | 0.1                                    | 1.8                                     |
| 158                           | 0.3                                    | 0.2                                     |
| 153                           | 0.1                                    | 0.5                                     |
| 153                           | 0.0                                    | 0.1                                     |
| 147                           | 0.0                                    | 0.8                                     |
| 138                           | 0.1                                    | 0.0                                     |
| 128                           | 0.2                                    | 0.4                                     |
| 124                           | 0.3                                    | 2.3                                     |
| 122                           | 0.0                                    | 0.7                                     |
| 116                           | 0.4                                    | 0.0                                     |
| 115                           | 1.7                                    | 0.7                                     |
| 100                           | 0.1                                    | 0.8                                     |
| 99                            | 0.1                                    | 0.1                                     |
| 92                            | 0.1                                    | 0.5                                     |

|    |     |     |
|----|-----|-----|
| 88 | 0.1 | 1.0 |
| 80 | 0.1 | 0.3 |
| 78 | 0.2 | 0.0 |
| 77 | 0.0 | 0.2 |
| 69 | 0.8 | 9.0 |

**Table 8. IETS relative intensities  $\eta$  in % per vibration mode in meV of DCNQI/Cu(100) as calculated by the IETS approach used in this study for vibrational modes above 50 meV. Two positions above the molecule have been quoted : on center and off center (above the functional groups) ones.**

| <b><math>\nu</math> (meV)</b> | <b><math>\eta</math> on center (%)</b> | <b><math>\eta</math> off center (%)</b> |
|-------------------------------|----------------------------------------|-----------------------------------------|
| 387                           | 0.1                                    | 0.0                                     |
| 387                           | 0.1                                    | 0.0                                     |
| 384                           | 0.1                                    | 0.0                                     |
| 384                           | 0.0                                    | 0.0                                     |
| 257                           | 0.2                                    | 1.1                                     |
| 254                           | 0.3                                    | 0.5                                     |
| 191                           | 0.1                                    | 1.1                                     |
| 186                           | 1.4                                    | 0.1                                     |
| 180                           | 1.0                                    | 0.4                                     |
| 171                           | 0.0                                    | 0.1                                     |
| 164                           | 0.3                                    | 0.4                                     |
| 163                           | 0.3                                    | 0.2                                     |
| 161                           | 0.2                                    | 0.7                                     |
| 157                           | 0.2                                    | 0.0                                     |
| 142                           | 4.1                                    | 0.2                                     |
| 137                           | 0.3                                    | 0.3                                     |
| 134                           | 0.0                                    | 0.2                                     |
| 134                           | 2.2                                    | 0.2                                     |
| 122                           | 0.1                                    | 0.1                                     |
| 109                           | 0.6                                    | 0.1                                     |
| 109                           | 2.4                                    | 0.2                                     |
| 100                           | 1.6                                    | 0.2                                     |
| 98                            | 0.7                                    | 0.3                                     |
| 97                            | 0.4                                    | 0.1                                     |
| 92                            | 0.3                                    | 0.8                                     |
| 83                            | 0.0                                    | 0.2                                     |
| 79                            | 0.1                                    | 0.3                                     |
| 76                            | 0.4                                    | 0.1                                     |

|    |     |     |
|----|-----|-----|
| 69 | 0.1 | 0.2 |
| 64 | 0.3 | 0.2 |
| 60 | 2.0 | 1.5 |
| 59 | 0.3 | 0.5 |
